# Supplementary material
Source: Springer Nature journal article supplement (https://www.springermedizin.de/resource/supplementary/12891_2005_176_MOESM4_ESM.pdf/9510714)

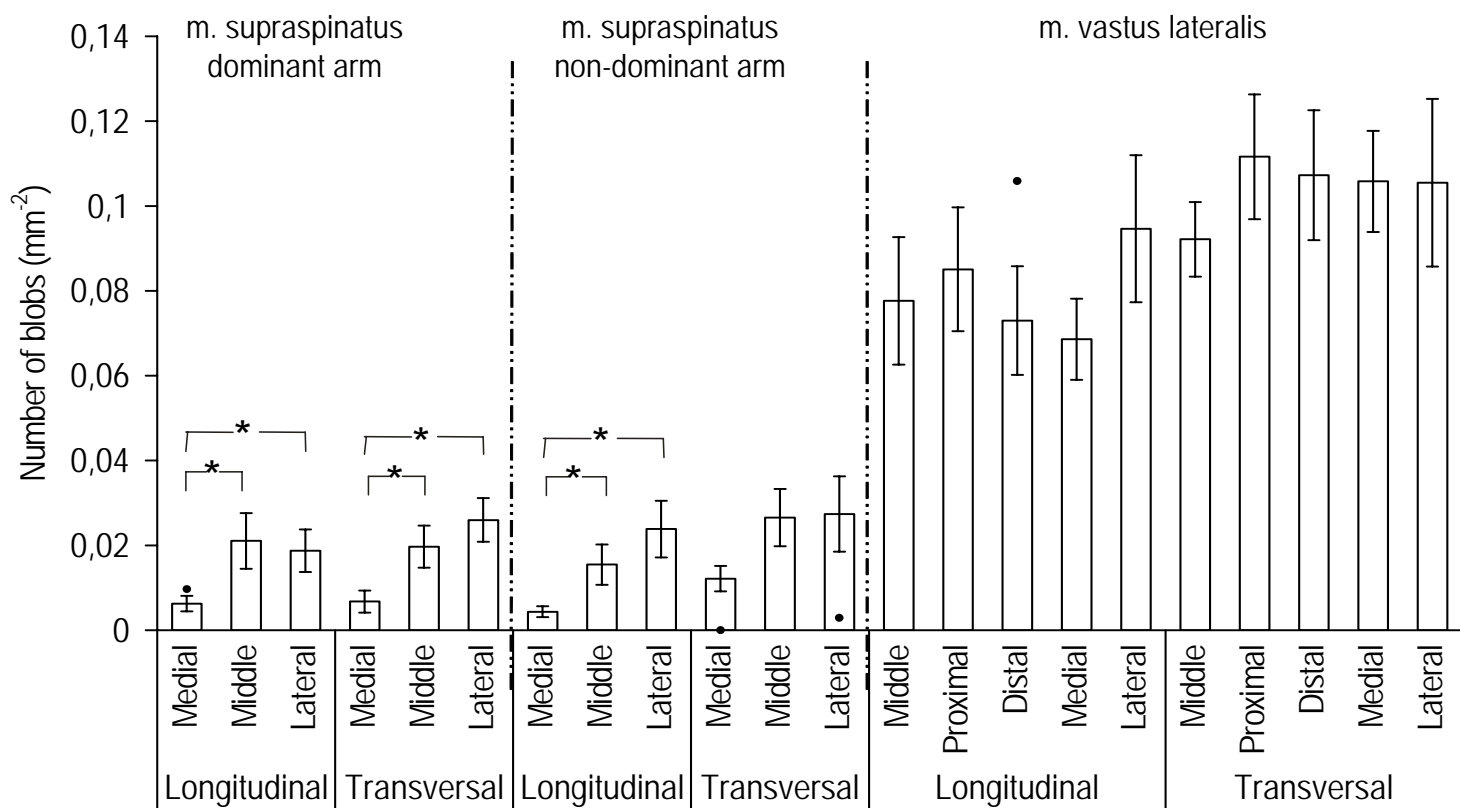

Supplement: MOESM4 [file 9510714]
